# Supplementary material for: Opening the Random Forest Black Box of the Metabolome by the Application of Surrogate Minimal Depth
Source: MDPI journal article supplement (doi:10.3390/metabo12010005), 2021-12-21
Supplement: s1 [file s1]

**Table S7.** Identified key metabolites of the asparagus samples with their LC-MS data, which show a dependency due to different origins.

| Tentative compound        | Proposed formula                                  | Adduct                            | RT [min] | <i>m/z</i> measured | <i>m/z</i> calculated | Error [ppm] | Relevant fragments                      |
|---------------------------|---------------------------------------------------|-----------------------------------|----------|---------------------|-----------------------|-------------|-----------------------------------------|
| <b>Glycolipids</b>        |                                                   |                                   |          |                     |                       |             |                                         |
| Glucose-linoleate         | C <sub>24</sub> H <sub>42</sub> O <sub>7</sub>    | [M+Na] <sup>+</sup>               | 5.1      | 465.2818            | 465.2823              | 0.9         | 202.11;<br>145.05                       |
| <b>Glycerolipids</b>      |                                                   |                                   |          |                     |                       |             |                                         |
| DG(36:2)                  | C <sub>39</sub> H <sub>72</sub> O <sub>5</sub>    | [M+NH <sub>4</sub> ] <sup>+</sup> | 14.0     | 638.5720            | 638.5718              | -0.4        | 341.30;<br>337.27                       |
| DG(36:3)                  | C <sub>39</sub> H <sub>70</sub> O <sub>5</sub>    | [M+NH <sub>4</sub> ] <sup>+</sup> | 13.2     | 636.5566            | 636.5562              | -0.7        | 339.29;<br>337.27                       |
| DGDG(36:4)                | C <sub>51</sub> H <sub>88</sub> O <sub>15</sub>   | [M+Na] <sup>+</sup>               | 9.7      | 963.5998            | 963.6015              | -1.8        | 617.51;<br>599.50;<br>337.27            |
| DGDG(36:5)                | C <sub>51</sub> H <sub>86</sub> O <sub>15</sub>   | [M+NH <sub>4</sub> ] <sup>+</sup> | 9.1      | 956.6298            | 956.6305              | -0.7        | 615.50;<br>597.49;<br>337.27;<br>335.26 |
| TG(52:3)                  | C <sub>55</sub> H <sub>100</sub> O <sub>6</sub>   | [M+Na] <sup>+</sup>               | 18.9     | 879.7421            | 879.7412              | 1.0         | 601.52;<br>577.52;<br>575.50            |
| TG(52:5; 20)              | C <sub>55</sub> H <sub>96</sub> O <sub>8</sub>    | [M+Na] <sup>+</sup>               | 15.1     | 907.6981            | 907.6997              | 1.8         | 597.49;<br>575.50;<br>574.49            |
| TG(53:3)                  | C <sub>56</sub> H <sub>102</sub> O <sub>6</sub>   | [M+Na] <sup>+</sup>               | 18.7     | 893.7562            | 893.7569              | 0.7         | /                                       |
| TG(54:4;20)               | C <sub>57</sub> H <sub>102</sub> O <sub>8</sub>   | [M+NH <sub>4</sub> ] <sup>+</sup> | 16.3     | 932.7909            | 932.7913              | -0.4        | 617.54                                  |
| TG(54:6;20)               | C <sub>57</sub> H <sub>98</sub> O <sub>8</sub>    | [M+Na] <sup>+</sup>               | 15.1     | 933.7143            | 933.7154              | 1.2         | 617.51;<br>599.50;<br>337.27            |
| TG(54:6;30)               | C <sub>57</sub> H <sub>98</sub> O <sub>9</sub>    | [M+NH <sub>4</sub> ] <sup>+</sup> | 14.1     | 944.7536            | 944.7520              | 1.4         | 613.48;<br>599.50                       |
| TG(54:7;10)               | C <sub>57</sub> H <sub>96</sub> O <sub>7</sub>    | [M+Na] <sup>+</sup>               | 15.5     | 915.7037            | 915.7048              | 1.2         | 893.72;<br>613.48;<br>599.50            |
| TG(54:7;20)               | C <sub>57</sub> H <sub>96</sub> O <sub>8</sub>    | [M+NH <sub>4</sub> ] <sup>+</sup> | 15.8     | 926.7442            | 926.7443              | -0.1        | 611.47;<br>599.50                       |
| TG(55:5)                  | C <sub>58</sub> H <sub>102</sub> O <sub>6</sub>   | [M+Na] <sup>+</sup>               | 18.3     | 917.7585            | 917.7569              | -1.7        | 615.53;<br>599.50                       |
| TG(58:4)                  | C <sub>61</sub> H <sub>110</sub> O <sub>6</sub>   | [M+NH <sub>4</sub> ] <sup>+</sup> | 19.6     | 956.8651            | 956.8641              | -1.1        | 659.60;<br>599.50                       |
| TG(58:5)                  | C <sub>61</sub> H <sub>102</sub> O <sub>6</sub>   | [M+H] <sup>+</sup>                | 18.7     | 931.7767            | 931.7749              | 1.9         | 652.56;<br>629.55;<br>599.50            |
| <b>Phospholipids</b>      |                                                   |                                   |          |                     |                       |             |                                         |
| PC(16:0)                  | C <sub>24</sub> H <sub>50</sub> NO <sub>7</sub> P | [M+H] <sup>+</sup>                | 4.8      | 496.3407            | 496.3398              | 1.9         | 184.07                                  |
| PC(O-22:0)                | C <sub>30</sub> H <sub>62</sub> NO <sub>7</sub> P | [M+H] <sup>+</sup>                | 7.7      | 580.4336            | 580.4337              | -0.1        | 184.07                                  |
| <b>Phytosterols</b>       |                                                   |                                   |          |                     |                       |             |                                         |
| Brassicasterol derivative | C <sub>56</sub> H <sub>85</sub> NO <sub>4</sub>   | [M+NH <sub>4</sub> ] <sup>+</sup> | 16.2     | 853.6807            | 853.6817              | -1.2        | 381.30                                  |
| Campesterol derivative    | C <sub>56</sub> H <sub>100</sub> O <sub>7</sub>   | [M+NH <sub>4</sub> ] <sup>+</sup> | 17.6     | 902.7811            | 902.7807              | -0.4        | 383.36                                  |
| Cycloartenol derivative I | C <sub>46</sub> H <sub>80</sub> O <sub>2</sub>    | [M+NH <sub>4</sub> ] <sup>+</sup> | 18.3     | 682.6499            | 682.6497              | -0.4        | 409.38;<br>191.18                       |

**Table S7– continued.**

|                             |                                                 |                                   |      |          |          |      |                |
|-----------------------------|-------------------------------------------------|-----------------------------------|------|----------|----------|------|----------------|
| Cycloartenol derivative II  | C <sub>48</sub> H <sub>80</sub> O <sub>2</sub>  | [M+NH <sub>4</sub> ] <sup>+</sup> | 17.8 | 706.6505 | 706.6497 | -1.2 | 409.38; 191.18 |
| Cycloartenol derivative III | C <sub>48</sub> H <sub>82</sub> O <sub>2</sub>  | [M+NH <sub>4</sub> ] <sup>+</sup> | 18.4 | 708.6652 | 708.6653 | -0.1 | 409.38; 191.18 |
| Sitosterol derivative       | C <sub>44</sub> H <sub>82</sub> O <sub>5</sub>  | [M+Na] <sup>+</sup>               | 16.0 | 713.6041 | 713.6054 | -1.8 | 397.38         |
| Stigmasterol derivative I   | C <sub>33</sub> H <sub>56</sub> O <sub>6</sub>  | [M+Na] <sup>+</sup>               | 7.8  |          |          |      | 395.37         |
| Stigmasterol derivative II  | C <sub>40</sub> H <sub>68</sub> O <sub>2</sub>  | [M+NH <sub>4</sub> ] <sup>+</sup> | 13.6 | 571.3965 | 571.3969 | -0.7 |                |
| Stigmasterol derivative III | C <sub>42</sub> H <sub>72</sub> O <sub>2</sub>  | [M+NH <sub>4</sub> ] <sup>+</sup> | 14.8 | 598.5559 | 598.5558 | 0.2  | 395.37         |
| Stigmasterol derivative IV  | C <sub>57</sub> H <sub>100</sub> O <sub>7</sub> | [M+Na] <sup>+</sup>               | 17.3 | 626.5864 | 626.5871 | 1.1  | 395.37         |
| <b>Ubiquinones</b>          |                                                 |                                   |      |          |          |      |                |
| Coenzyme Q9                 | C <sub>54</sub> H <sub>82</sub> O <sub>4</sub>  | [M+NH <sub>4</sub> ] <sup>+</sup> | 16.5 | 812.6558 | 812.6551 | -0.8 | 197.08         |
| Coenzyme Q10                | C <sub>59</sub> H <sub>90</sub> O <sub>4</sub>  | [M+NH <sub>4</sub> ] <sup>+</sup> | 17.5 | 880.7191 | 880.7177 | 1.5  | 197.08         |
| <b>Waxes</b>                |                                                 |                                   |      |          |          |      |                |
| Wax monoester               | C <sub>34</sub> H <sub>64</sub> O <sub>2</sub>  | [M+NH <sub>4</sub> ] <sup>+</sup> | 14.7 | 522.5240 | 522.5245 | 0.9  | /              |

Abbreviations: DG, diacylglycerol; DGDG, digalactosyldiacylglycerol; PC, phosphatidylcholin; TG, triacylglycerol
